# Supplementary material for: Population Pharmacokinetic/Pharmacodynamic Analysis of Nociceptive Pain Models Following an Oral Pregabalin Dose Administration to Healthy Subjects
Source: PubMed Central journal article supplement — CPT Pharmacometrics Syst Pharmacol. 2018 Aug 13;7(9):573–80. doi: 10.1002/psp4.12318 (PMC6157667; doi:10.1002/psp4.12318), 2018-08-13
Supplement: PSP4-7-573-s001.pdf [file PSP4-7-573-s001.pdf]

# Supplementary Appendix 1 – Goodness of fit

## Pharmacokinetics

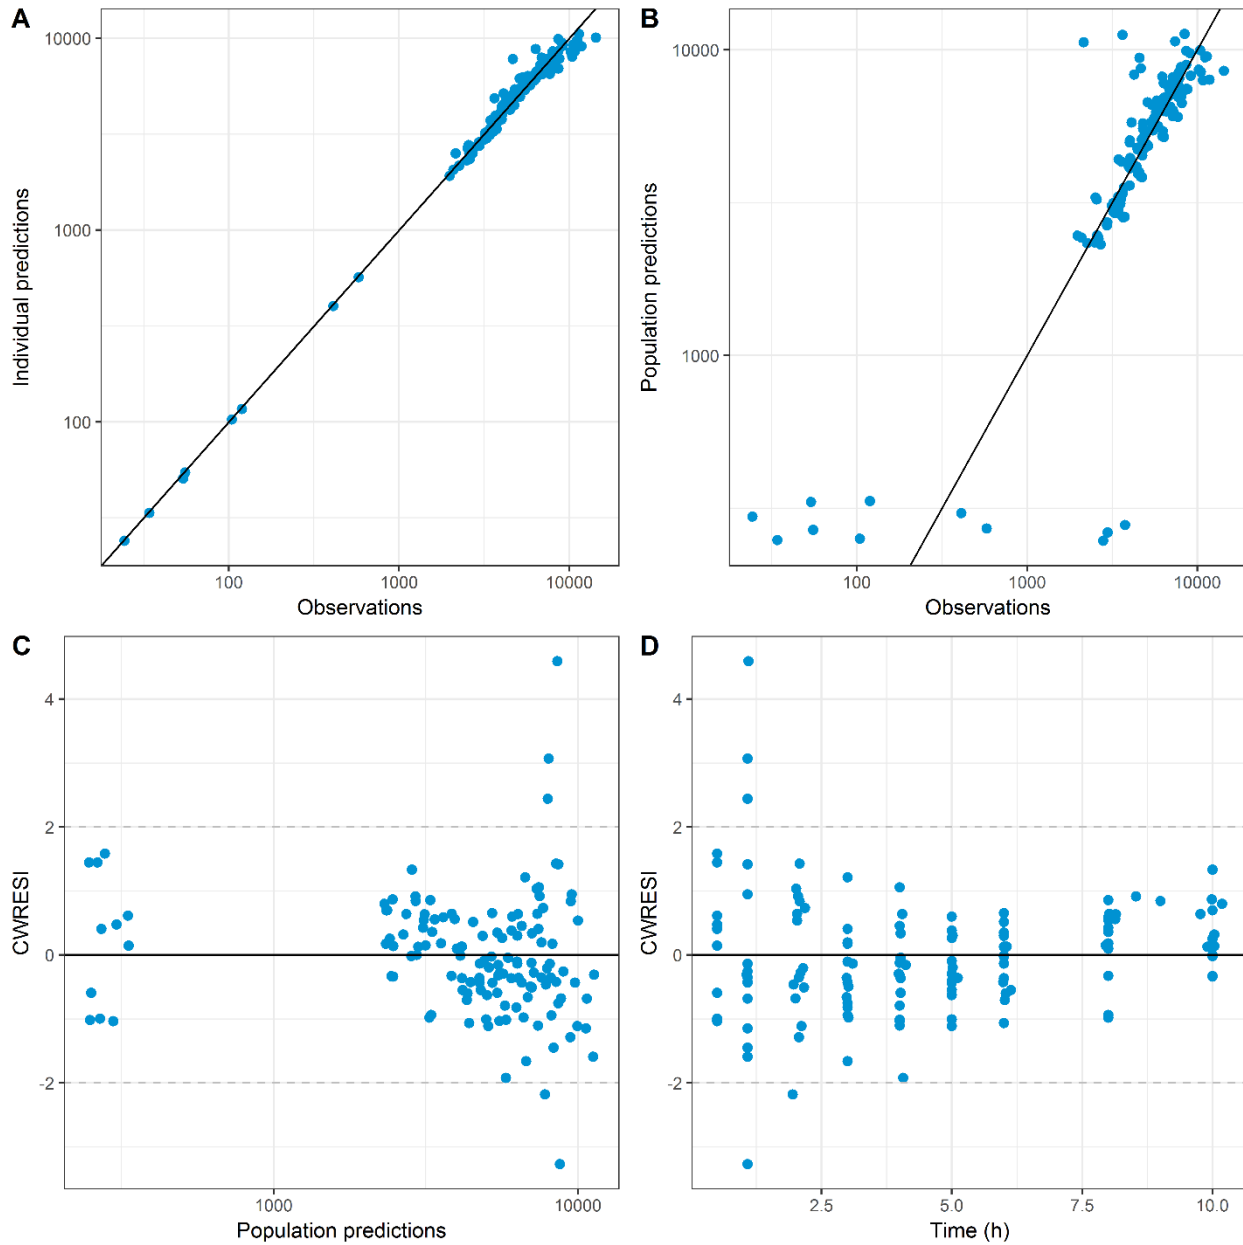

Individual model predictions vs observations (A), population predictions vs observations (B) CWRESI vs population predictions (C) and CWRESI vs time after dose (D). CWRESI = conditional weighted residuals with interaction, black solid line = line of unity, grey dashed line = [-2, 2] interval.

## Cold pressor PTT

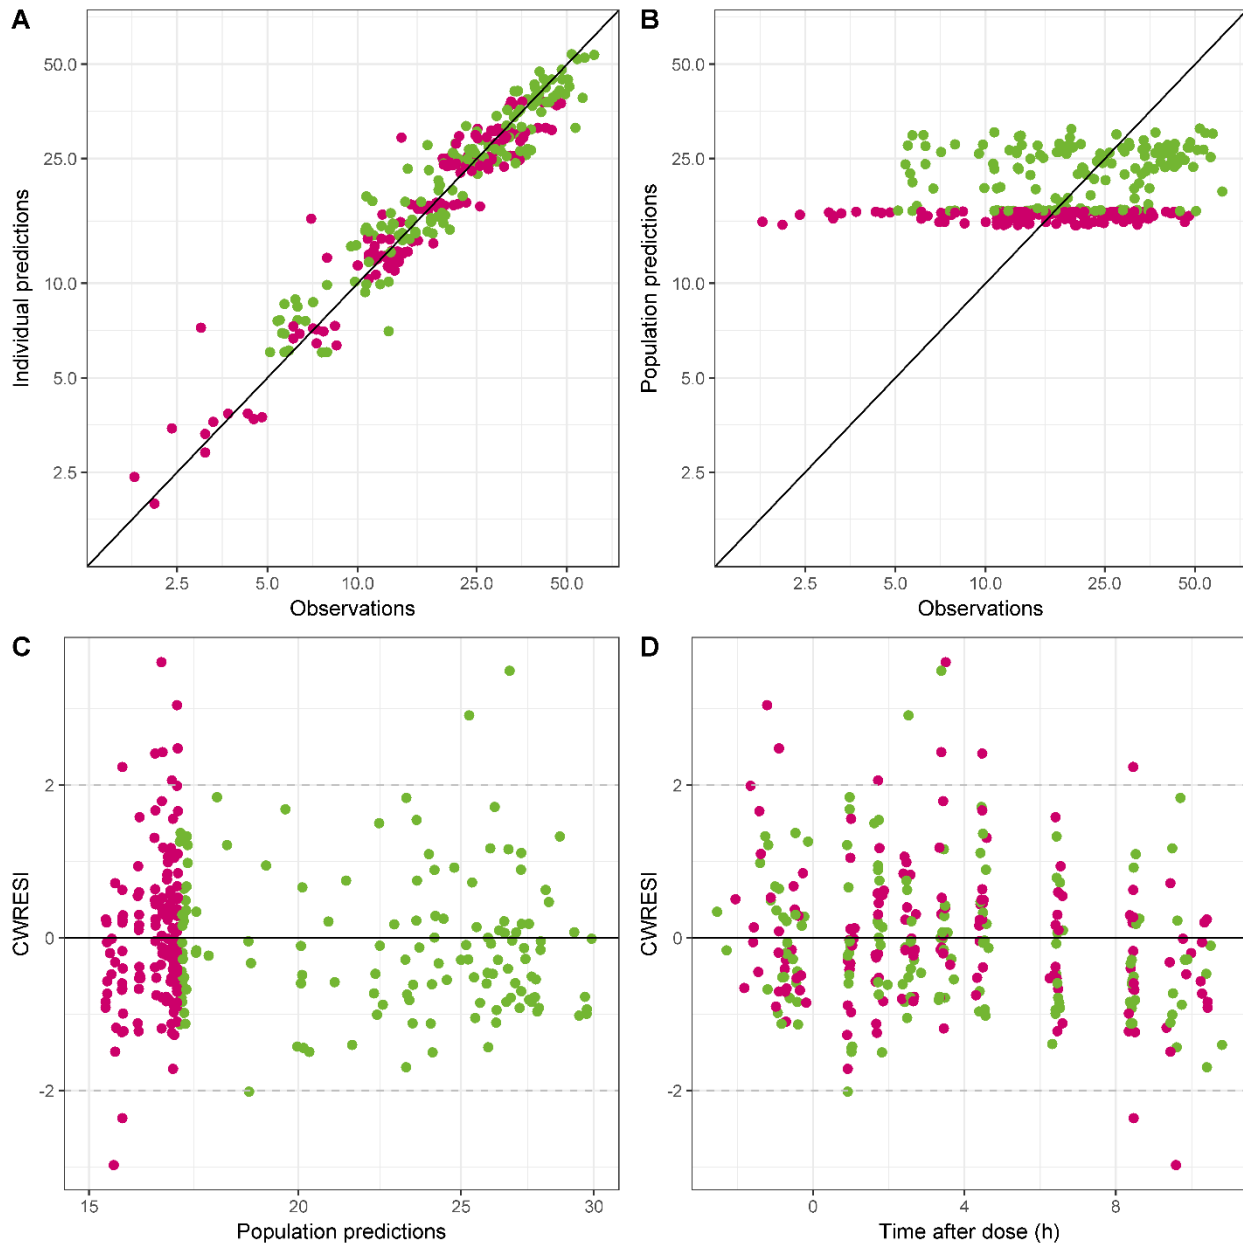

Individual model predictions vs observations (A), population predictions vs observations (B) CWRESI vs population predictions (C) and CWRESI vs time after dose (D). Green dots = pregabalin visit measurements, purple dots = placebo visit measurements, CWRESI = conditional weighted residuals with interaction, black solid line = line of unity, grey dashed line = [-2, 2] interval.

## Electrical stimulation PTT

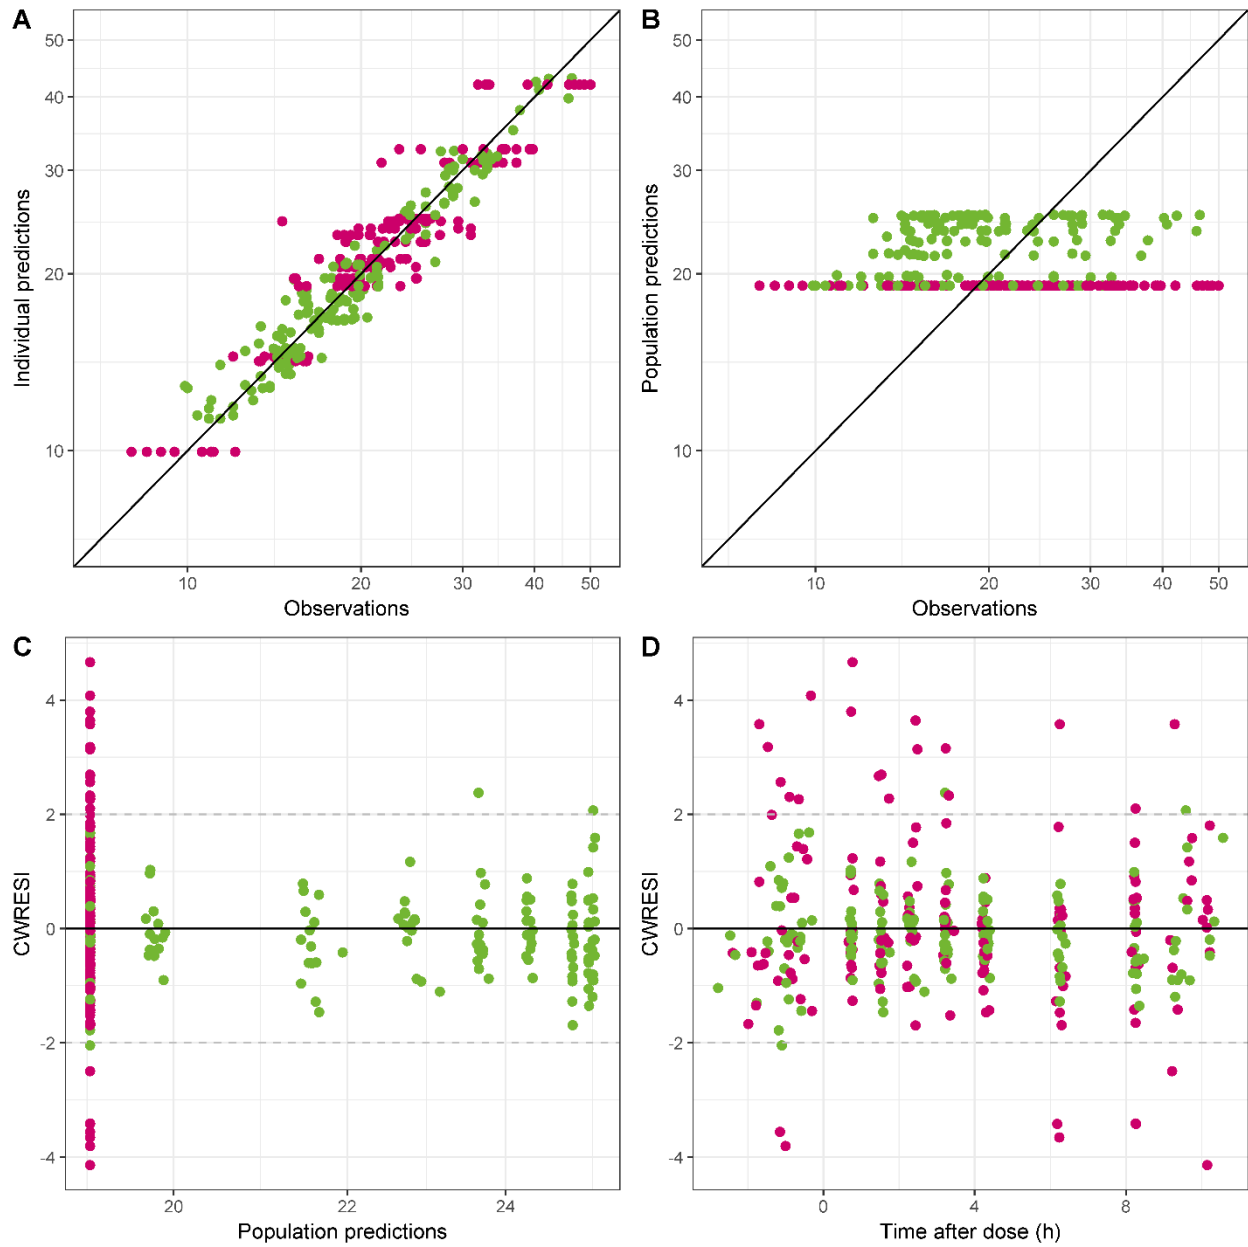

Individual model predictions vs observations (A), population predictions vs observations (B) CWRESI vs population predictions (C) and CWRESI vs time after dose (D). Green dots = pregabalin visit measurements, purple dots = placebo visit measurements, CWRESI = conditional weighted residuals with interaction, black solid line = line of unity, grey dashed line = [-2, 2] interval.
