# Supplementary material for: Population Pharmacokinetic/Pharmacodynamic Analysis of Nociceptive Pain Models Following an Oral Pregabalin Dose Administration to Healthy Subjects
Source: PubMed Central journal article supplement — CPT Pharmacometrics Syst Pharmacol. 2018 Aug 13;7(9):573–80. doi: 10.1002/psp4.12318 (PMC6157667; doi:10.1002/psp4.12318), 2018-08-13
Supplement: PSP4-7-573-s003.pdf [file PSP4-7-573-s003.pdf]

# S3 – Model variance correlations

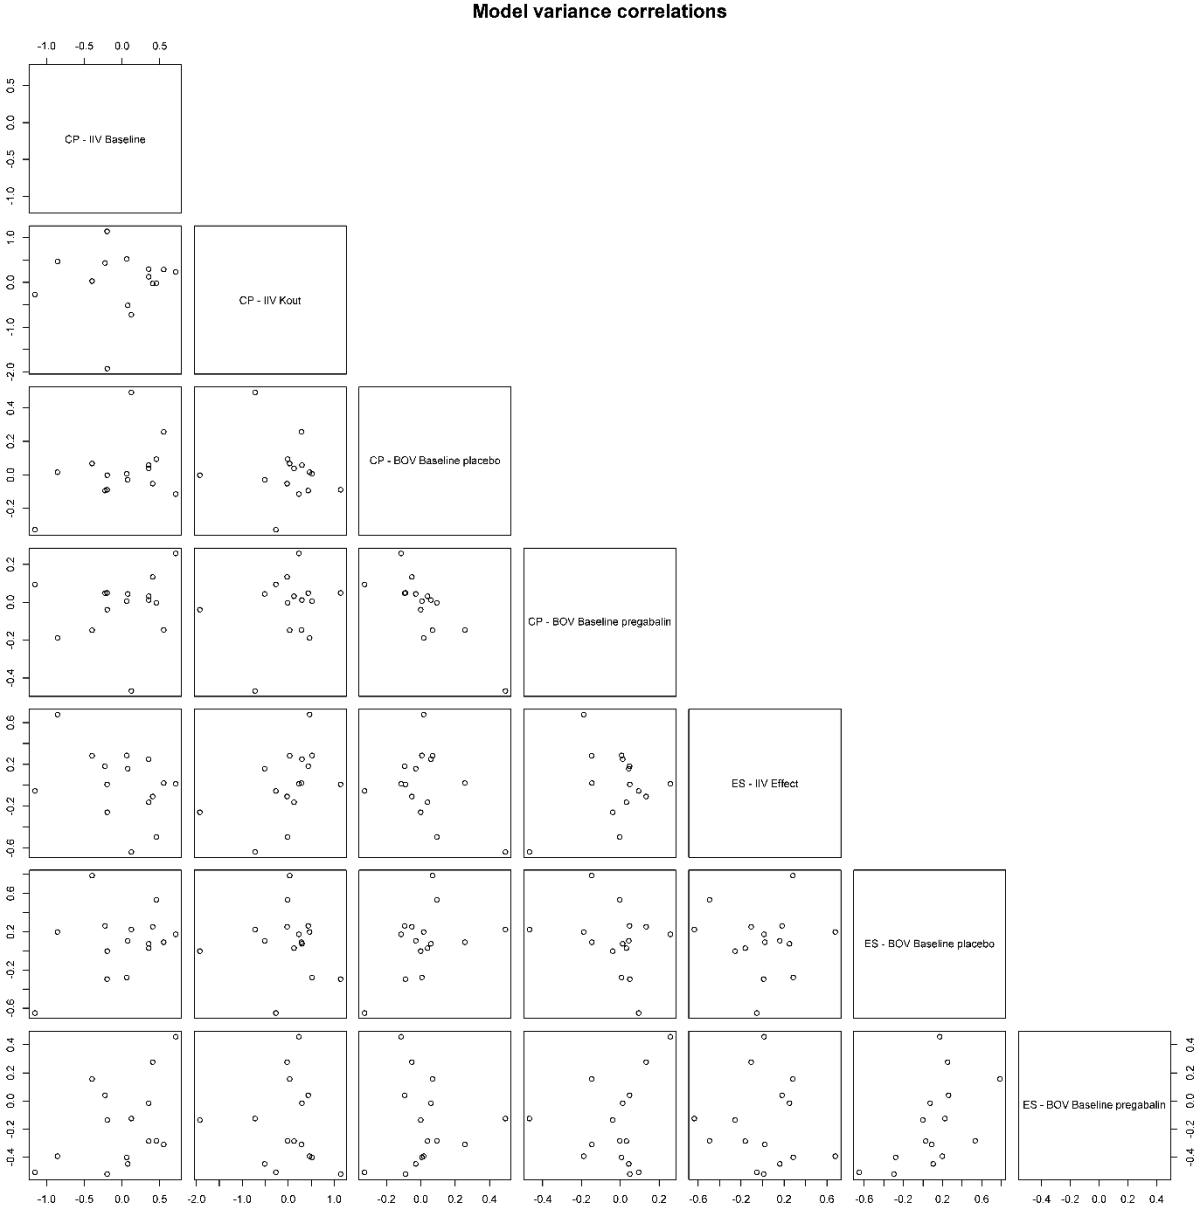

Model variance correlations of the cold pressor PTT model (CP) and the electrical stimulation PTT model (ES).

Figure depicts the individual post hoc Bayesian estimates of the inter-individual variability (IIV) and the between occasion variability (BOV) included in both models.
